# Supplementary material for: Effects of Fish Oil and Grape Seed Extract Combination on Hepatic Endogenous Antioxidants and Bioactive Lipids in Diet-Induced Early Stages of Insulin Resistance in Rats
Source: MDPI journal article supplement (doi:10.3390/md18060318), 2020-06-16
Supplement: s1 [file s1]

## Supplementary data:

# Effects of Fish Oil and Grape Seed Extract Combination on Hepatic Endogenous Antioxidants and Bioactive Lipids in Diet-Induced Early Stages of Insulin Resistance in Rats

Núria Taltavull <sup>1</sup>, Bernat Miralles-Pérez <sup>1,\*</sup>, Maria Rosa Nogués <sup>1</sup>, Sara Ramos-Romero <sup>2,3</sup>, Lucía Méndez <sup>4</sup>, Isabel Medina <sup>4</sup>, Josep Lluís Torres <sup>2</sup> and Marta Romeu <sup>1</sup>

<sup>1</sup> Universitat Rovira i Virgili, Department of Basic Medical Sciences, Pharmacology Unit, Functional Nutrition, Oxidation, and Cardiovascular Disease (NFOC-SALUT) group, C/ Sant Llorenç 21, E-43201 Reus, Spain; nuria.taltavull@urv.cat (N.T.); mariarosa.nogues@urv.cat (M.R.N.); marta.romeu@urv.cat (M.R.N.)

<sup>2</sup> Institute of Advanced Chemistry of Catalonia (IQAC-CSIC), C/ Jordi Girona 18-26, E-08034 Barcelona, Spain; sara.ramos@iqac.csic.es (S.R.-R.); josepluis.torres@iqac.csic.es (J.L.T.)

<sup>3</sup> Department of Cell Biology, Physiology & Immunology, Faculty of Biology, University of Barcelona, E-08028 Barcelona, Spain

<sup>4</sup> Institute of Marine Research (IIM-CSIC), C/ Eduardo Cabello 6, E-36208 Vigo, Spain; luciamendez@iim.csic.es (L.M.); medina@iim.csic.es (I.M.)

\* Correspondence: bernat.miralles@urv.cat; Tel.: +34-977-759-378

| <b>Table S4. Fatty acid composition of diets</b>                                                                                                                                                                                                                                                                  |            |                     |                        |
|-------------------------------------------------------------------------------------------------------------------------------------------------------------------------------------------------------------------------------------------------------------------------------------------------------------------|------------|---------------------|------------------------|
|                                                                                                                                                                                                                                                                                                                   | <b>STD</b> | <b>HFHS and GSE</b> | <b>FO and FO + GSE</b> |
| 14:00                                                                                                                                                                                                                                                                                                             | 0.017      | 11.5                | 11.6                   |
| 16:00                                                                                                                                                                                                                                                                                                             | 14.8       | 32.2                | 32.0                   |
| 16:1 n-7                                                                                                                                                                                                                                                                                                          | 0.015      | 1.7                 | 1.7                    |
| 18:00                                                                                                                                                                                                                                                                                                             | 2.9        | 13.7                | 13.7                   |
| 18:1n-9                                                                                                                                                                                                                                                                                                           | 20.5       | 26.4                | 26.2                   |
| 18:1 n-7                                                                                                                                                                                                                                                                                                          | 0.026      | 0.67                | 0.68                   |
| 18:2 n-6                                                                                                                                                                                                                                                                                                          | 58.6       | 9.7                 | 8.7                    |
| 20:00                                                                                                                                                                                                                                                                                                             | n.d.       | n.d.                | 0.0069                 |
| 18:3 n-3                                                                                                                                                                                                                                                                                                          | 2.9        | 1.1                 | 1.1                    |
| 20:1 n-9                                                                                                                                                                                                                                                                                                          | 0.025      | 0.031               | 0.021                  |
| 18:4 n-3                                                                                                                                                                                                                                                                                                          | 0.0026     | 0.0032              | 0.033                  |
| 20:2 n-6                                                                                                                                                                                                                                                                                                          | 0.0034     | 0.0043              | 0.0045                 |
| 20:3 n-6                                                                                                                                                                                                                                                                                                          | n.d.       | n.d.                | 0.0048                 |
| 20:4 n-6                                                                                                                                                                                                                                                                                                          | 0.0069     | 0.0086              | 0.036                  |
| 22:1 n-11                                                                                                                                                                                                                                                                                                         | 0.019      | 0.023               | 0.024                  |
| 22:1 n-9                                                                                                                                                                                                                                                                                                          | 0.0043     | 0.0054              | 0.006                  |
| 20:4 n-3                                                                                                                                                                                                                                                                                                          | 0.0034     | 0.0043              | 0.022                  |
| 20:5 n-3                                                                                                                                                                                                                                                                                                          | 0.012      | 0.015               | 0.54                   |
| 24:1 n-9                                                                                                                                                                                                                                                                                                          | 0.0048     | 0.0060              | 0.0082                 |
| 22:5 n-3                                                                                                                                                                                                                                                                                                          | 0.0045     | 0.0056              | 0.093                  |
| 22:6 n-3                                                                                                                                                                                                                                                                                                          | 0.02       | 0.024               | 0.56                   |
| Total SFAs                                                                                                                                                                                                                                                                                                        | 17.5       | 59.4                | 60.5                   |
| Total MUFA                                                                                                                                                                                                                                                                                                        | 21.1       | 29.3                | 28.4                   |
| Total PUFA                                                                                                                                                                                                                                                                                                        | 61.1       | 10.8                | 10.7                   |
| Total n-3                                                                                                                                                                                                                                                                                                         | 3.3        | 1.6                 | 1.4                    |
| Total n-6                                                                                                                                                                                                                                                                                                         | 58.8       | 10.4                | 10.6                   |
| Results are expressed as a percentage of total fatty acids (mg/100 mg of total fatty acids). Abbreviations: STD, Standard; HFHS, High-fat High-sucrose; FO, Fish Oil; GSE, Grape Seed Extract; SFA, Saturated Fatty Acid; MUFA, Monounsaturated Fatty Acid; PUFA, Polyunsaturated Fatty Acid; n.d., non-detected. |            |                     |                        |
