# Supplementary material for: Effects of Fish Oil and Grape Seed Extract Combination on Hepatic Endogenous Antioxidants and Bioactive Lipids in Diet-Induced Early Stages of Insulin Resistance in Rats
Source: MDPI journal article supplement (doi:10.3390/md18060318), 2020-06-16
Supplement: s1 [file s1]

## Supplementary data:

# Effects of Fish Oil and Grape Seed Extract Combination on Hepatic Endogenous Antioxidants and Bioactive Lipids in Diet-Induced Early Stages of Insulin Resistance in Rats

Núria Taltavull <sup>1</sup>, Bernat Miralles-Pérez <sup>1,\*</sup>, Maria Rosa Nogués <sup>1</sup>, Sara Ramos-Romero <sup>2,3</sup>,  
Lucía Méndez <sup>4</sup>, Isabel Medina <sup>4</sup>, Josep Lluís Torres <sup>2</sup> and Marta Romeu <sup>1</sup>

<sup>1</sup> Universitat Rovira i Virgili, Department of Basic Medical Sciences, Pharmacology Unit, Functional Nutrition, Oxidation, and Cardiovascular Disease (NFOC-SALUT) group, C/ Sant Llorenç 21, E-43201 Reus, Spain; nuria.taltavull@urv.cat (N.T.); mariarosa.nogues@urv.cat (M.R.N.); marta.romeu@urv.cat (M.R.N.)

<sup>2</sup> Institute of Advanced Chemistry of Catalonia (IQAC-CSIC), C/ Jordi Girona 18-26, E-08034 Barcelona, Spain; sara.ramos@iqac.csic.es (S.R.-R.); josepluis.torres@iqac.csic.es (J.L.T.)

<sup>3</sup> Department of Cell Biology, Physiology & Immunology, Faculty of Biology, University of Barcelona, E-08028 Barcelona, Spain

<sup>4</sup> Institute of Marine Research (IIM-CSIC), C/ Eduardo Cabello 6, E-36208 Vigo, Spain; luciamendez@iim.csic.es (L.M.); medina@iim.csic.es (I.M.)

\* Correspondence: bernat.miralles@urv.cat; Tel.: +34-977-759-378

**Table S1. Biometric and biochemical data in rats after 24 weeks of dietary intervention\***

|                        | STD<br>n = 7 | HFHS<br>n = 7              | FO<br>n = 7                | GSE<br>n = 7                 | FO + GSE<br>n = 7         | <i>p</i> -value <sup>†</sup> |
|------------------------|--------------|----------------------------|----------------------------|------------------------------|---------------------------|------------------------------|
| Body weight (g)        | 256.0 ± 13.9 | 291.6 ± 23.9 <sup>a</sup>  | 318.3 ± 41.8 <sup>a</sup>  | 289.8 ± 19.6 <sup>a</sup>    | 291.2 ± 25.7 <sup>a</sup> | 0.005                        |
| Perigonadal WAT (g)    | 4.9 ± 1.1    | 19.6 ± 12.2 <sup>a</sup>   | 19.7 ± 9.5 <sup>a</sup>    | 15.5 ± 6.3 <sup>a</sup>      | 12.7 ± 5.0                | 0.002                        |
| Liver (g)              | 6.7 ± 1.2    | 7.2 ± 0.5                  | 6.8 ± 0.3                  | 7.4 ± 0.7                    | 7.7 ± 0.7                 | NS                           |
| Blood glucose (mmol/L) | 3.58 ± 0.15  | 3.65 ± 0.20                | 3.56 ± 0.38                | 3.63 ± 0.26                  | 3.72 ± 0.22               | NS                           |
| Plasma insulin (mU/L)  | 27.27 ± 9.55 | 58.38 ± 15.95 <sup>a</sup> | 57.66 ± 34.23 <sup>a</sup> | 74.20 ± 33.87 <sup>a</sup>   | 43.34 ± 30.10             | 0.008                        |
| HOMA-IR                | 4.38 ± 1.63  | 9.50 ± 2.64 <sup>a</sup>   | 9.32 ± 6.08 <sup>a</sup>   | 12.11 ± 6.05 <sup>a</sup>    | 7.30 ± 5.20               | 0.012                        |
| Plasma TAG (mmol/L)    | 1.53 ± 0.43  | 1.25 ± 0.20                | 1.57 ± 0.35                | 2.19 ± 0.20 <sup>a,b,c</sup> | 1.46 ± 0.27 <sup>d</sup>  | <0.001                       |

Results were expressed as mean  $\pm$  standard deviation. Abbreviations: STD, Standard; HFHS, High-Fat High-Sucrose; FO, Fish Oil; GSE, Grape Seed Extract; WAT, White Adipose Tissue; HOMA- IR, Homeostatic Assessment Model of Insulin Resistance; TAG, Triacylglycerol. \*These data have already been described in previous reports [1-4]. <sup>†</sup>p-value ( $<0.05$ ) was calculated by the non-parametric Kruskal-Wallis test followed by Mann-Whitney U test. a; vs. STD group, b; vs. HFHS group, c; vs. FO group, d; vs GSE group.

## References

1. Méndez, L.; Muñoz, S.; Miralles-Pérez, B.; Rosa Nogués, M.; Ramos-Romero, S.; Torres, J.L.; Medina, I. Modulation of the liver protein carbonylome by the combined effect of marine omega-3 PUFAs and grape polyphenols supplementation in rats fed an obesogenic high fat and high sucrose diet. *Mar. Drugs* **2020**, *18*, 1–30. doi:10.3390/md18010034.
2. Dasilva, G.; Pazos, M.; García-Egido, E.; Gallardo, J.M.; Ramos-Romero, S.; Torres, J.L.; Romeu, M.; Nogués, M.R.; Medina, I. A lipidomic study on the regulation of inflammation and oxidative stress targeted by marine  $\omega$ -3 PUFA and polyphenols in high-fat high-sucrose diets. *J. Nutr. Biochem.* **2017**, *43*, 53–67, doi:10.1016/j.jnutbio.2017.02.007.
3. Méndez, L.; Ciordia, S.; Fernández, M.S.; Juárez, S.; Ramos, A.; Pazos, M.; Gallardo, J.M.; Torres, J.L.; Nogués, M.R.; Medina, I. Changes in liver proteins of rats fed standard and high-fat and sucrose diets induced by fish omega-3 PUFAs and their combination with grape polyphenols according to quantitative proteomics. *J. Nutr. Biochem.* **2017**, *41*, 84–97. doi:10.1016/j.jnutbio.2016.12.005.
4. Ramos-Romero, S.; Molinar-Toribio, E.; Pérez-Jiménez, J.; Taltavull, N.; Dasilva, G.; Romeu, M.; Medina, I.; Torres, J.L. The combined action of omega-3 polyunsaturated fatty acids and grape proanthocyanidins on a rat model of diet-induced metabolic alterations. *Food Funct.* **2016**, *7*, 3516–3523. doi:10.1039/c6fo00679e.
