# Supplementary material for: Effects of Fish Oil and Grape Seed Extract Combination on Hepatic Endogenous Antioxidants and Bioactive Lipids in Diet-Induced Early Stages of Insulin Resistance in Rats
Source: MDPI journal article supplement (doi:10.3390/md18060318), 2020-06-16
Supplement: s1 [file s1]

## Supplementary data:

# Effects of Fish Oil and Grape Seed Extract Combination on Hepatic Endogenous Antioxidants and Bioactive Lipids in Diet-Induced Early Stages of Insulin Resistance in Rats

Núria Taltavull <sup>1</sup>, Bernat Miralles-Pérez <sup>1,\*</sup>, Maria Rosa Nogués <sup>1</sup>, Sara Ramos-Romero <sup>2,3</sup>,  
Lucía Méndez <sup>4</sup>, Isabel Medina <sup>4</sup>, Josep Lluís Torres <sup>2</sup> and Marta Romeu <sup>1</sup>

<sup>1</sup> Universitat Rovira i Virgili, Department of Basic Medical Sciences, Pharmacology Unit, Functional Nutrition, Oxidation, and Cardiovascular Disease (NFOC-SALUT) group, C/ Sant Llorenç 21, E-43201 Reus, Spain; nuria.taltavull@urv.cat (N.T.); mariarosa.nogues@urv.cat (M.R.N.); marta.romeu@urv.cat (M.R.N.)

<sup>2</sup> Institute of Advanced Chemistry of Catalonia (IQAC-CSIC), C/ Jordi Girona 18-26, E-08034 Barcelona, Spain; sara.ramos@iqac.csic.es (S.R.-R.); josepluis.torres@iqac.csic.es (J.L.T.)

<sup>3</sup> Department of Cell Biology, Physiology & Immunology, Faculty of Biology, University of Barcelona, E-08028 Barcelona, Spain

<sup>4</sup> Institute of Marine Research (IIM-CSIC), C/ Eduardo Cabello 6, E-36208 Vigo, Spain; luciamendez@iim.csic.es (L.M.); medina@iim.csic.es (I.M.)

\* Correspondence: bernat.miralles@urv.cat; Tel.: +34-977-759-378

| Table S5. Characterization used for the liver histological study |        |
|------------------------------------------------------------------|--------|
| Meaning Liver                                                    | Grade  |
| <b>Steatosis</b>                                                 |        |
| Physiological state                                              | < 5%   |
| Low-grade                                                        | 5-33%  |
| Middle-grade                                                     | 33-66% |
| High-grade                                                       | > 66%  |
| <b>Localization of steatosis</b>                                 |        |
| Centrilobular                                                    | 0      |
| Periportal                                                       | 1      |
| No zonal                                                         | 2      |
| <b>Lobular inflammation</b>                                      |        |
| No                                                               | 0      |
| < 2 focus                                                        | 1      |
| 2-4 focus                                                        | 2      |
| > 4 focus                                                        | 3      |
| <b>Portal inflammation</b>                                       |        |
| No                                                               | 0      |
| Yes                                                              | 1      |
